# Supplementary material for: Mulinum crassifolium Phil; Two New Mulinanes, Gastroprotective Activity and Metabolomic Analysis by UHPLC-Orbitrap Mass Spectrometry
Source: PubMed Central journal article supplement (PMC6539732; doi:10.3390/molecules24091673), 2019-04-28
Supplement: molecules-24-01673-s001.pdf [file molecules-24-01673-s001.pdf]

## *Supplementary Material*

### ***Mulinum crassifolium* Phil; Two new mulinane, gastroprotective activity and metabolomic analysis by UHPLC-Orbitrap mass spectrometry**

**Carlos Areche<sup>1</sup>, Ronald Fernandez-Burgos<sup>1,2</sup>, Teresa Cano<sup>2</sup>, Mario Simirgiotis<sup>3</sup>, Olimpo García-Beltrán<sup>4</sup>, Jorge Borquez<sup>5</sup>, Beatriz Sepulveda<sup>6\*</sup>**

<sup>1</sup>Departamento de Química, Facultad de Ciencias, Universidad de Chile, Santiago, Chile

<sup>2</sup>Departamento de Química, Facultad de Ciencias Naturales y Formales, Universidad Nacional de San Agustín, Arequipa, Perú

<sup>3</sup>Instituto de Farmacia, Facultad de Ciencias, Universidad Austral de Chile, Valdivia, Chile

<sup>4</sup>Facultad de Ciencias Naturales y Matemáticas, Universidad de Ibagué, Carrera 22 calle 67, Ibagué 730002, Colombia

<sup>5</sup>Departamento de Química, Facultad de Ciencias Básicas, Universidad de Antofagasta, Av Coloso S-N, Antofagasta, Chile

<sup>6</sup>Departamento de Ciencias Químicas, Universidad Andres Bello, Campus Viña del Mar, Quillota 980, Viña del Mar, Chile

\* **Correspondence:** bsepulveda@uc.cl

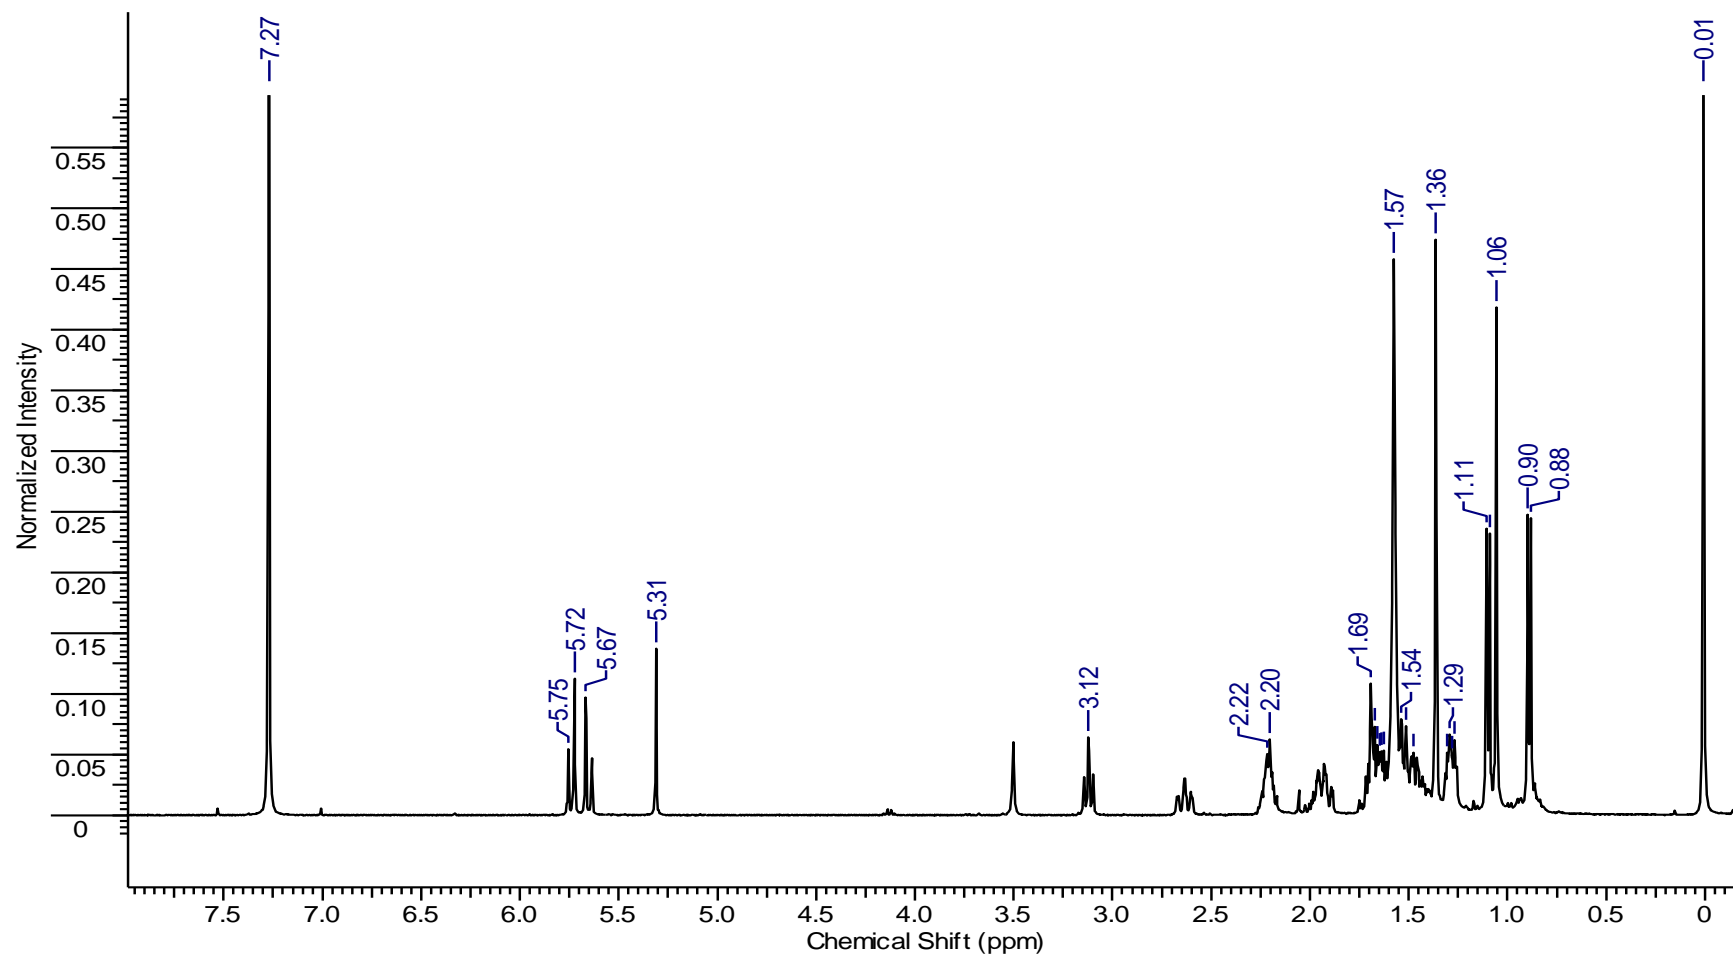

S1.  $^1\text{H}$  NMR spectrum of the compound **3** (400 MHz,  $\text{CDCl}_3$ )

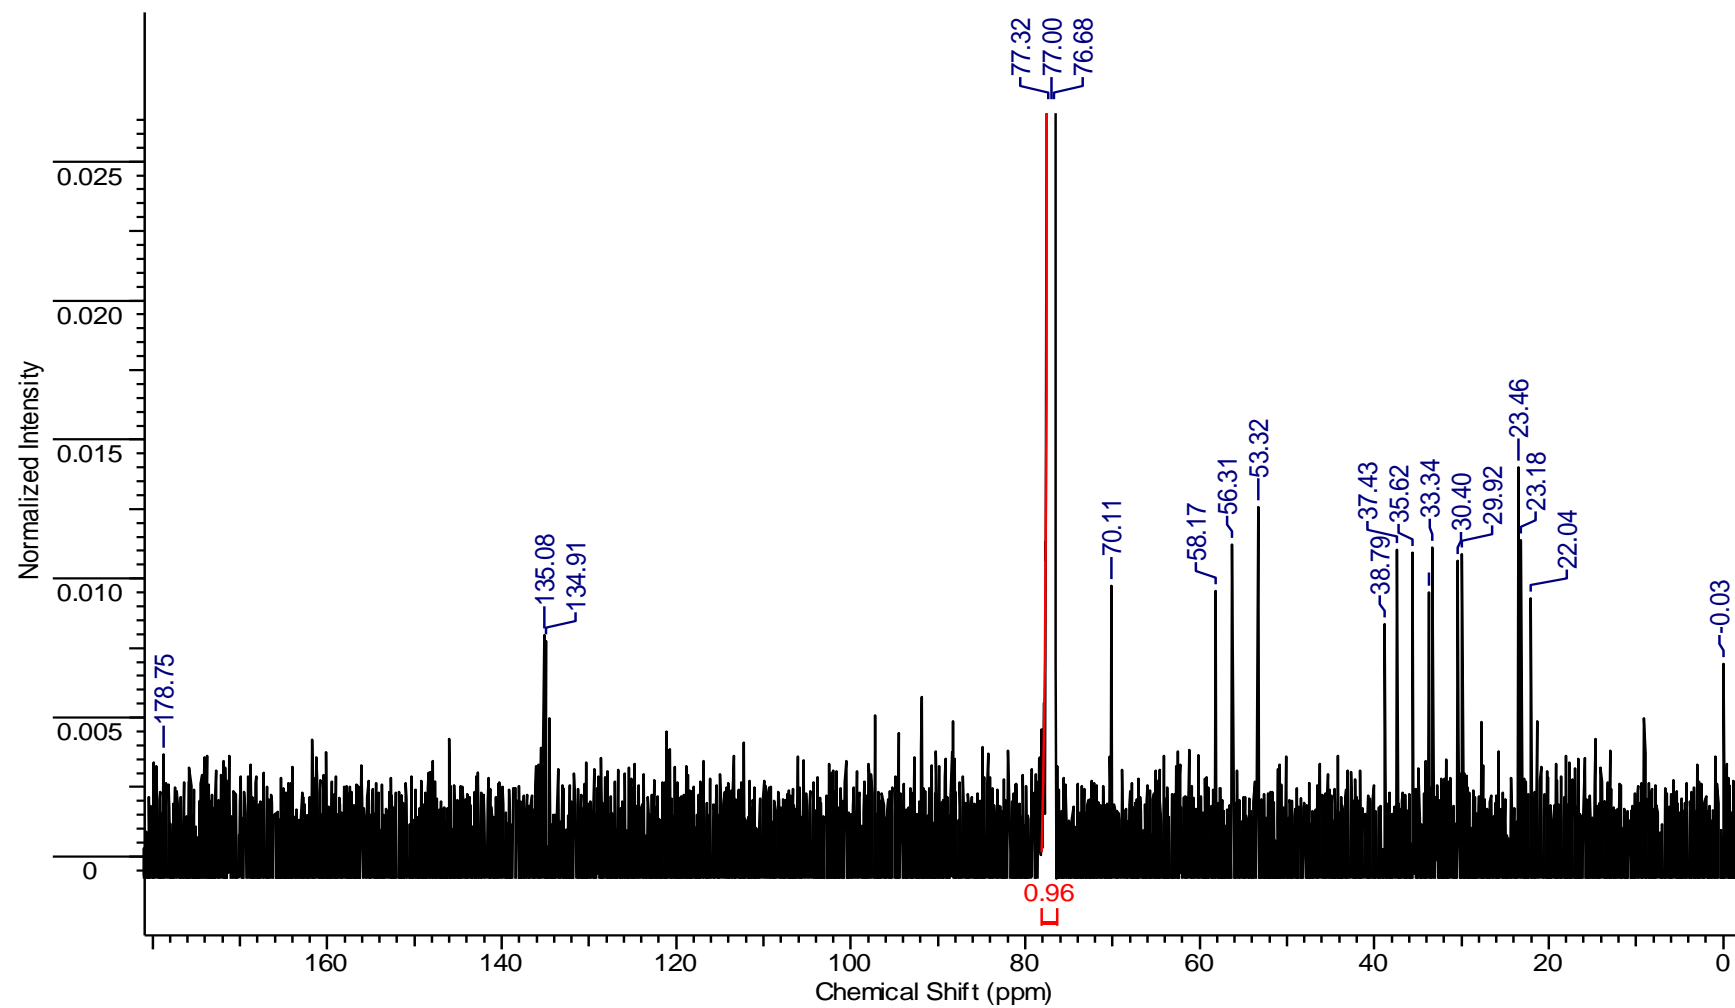

S2.  $^{13}\text{C}$  NMR spectrum of the compound **3** (100 MHz,  $\text{CDCl}_3$ )

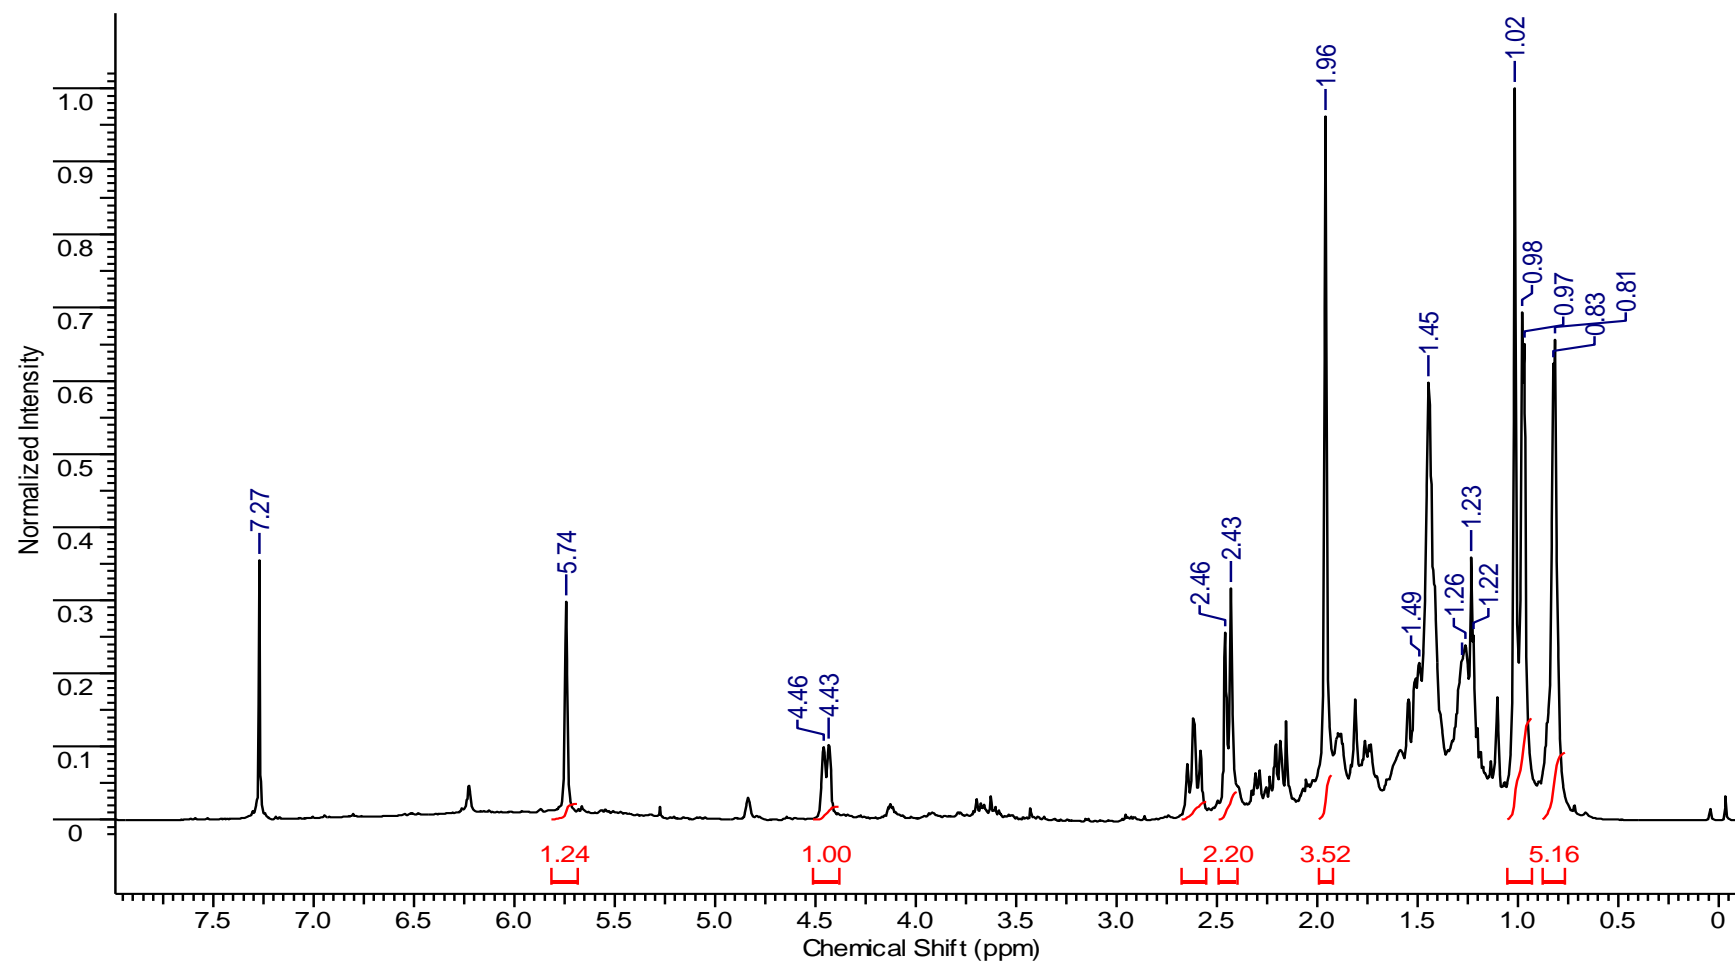S3.  $^1\text{H}$  NMR spectrum of the compound **5** (400 MHz,  $\text{CDCl}_3$ )

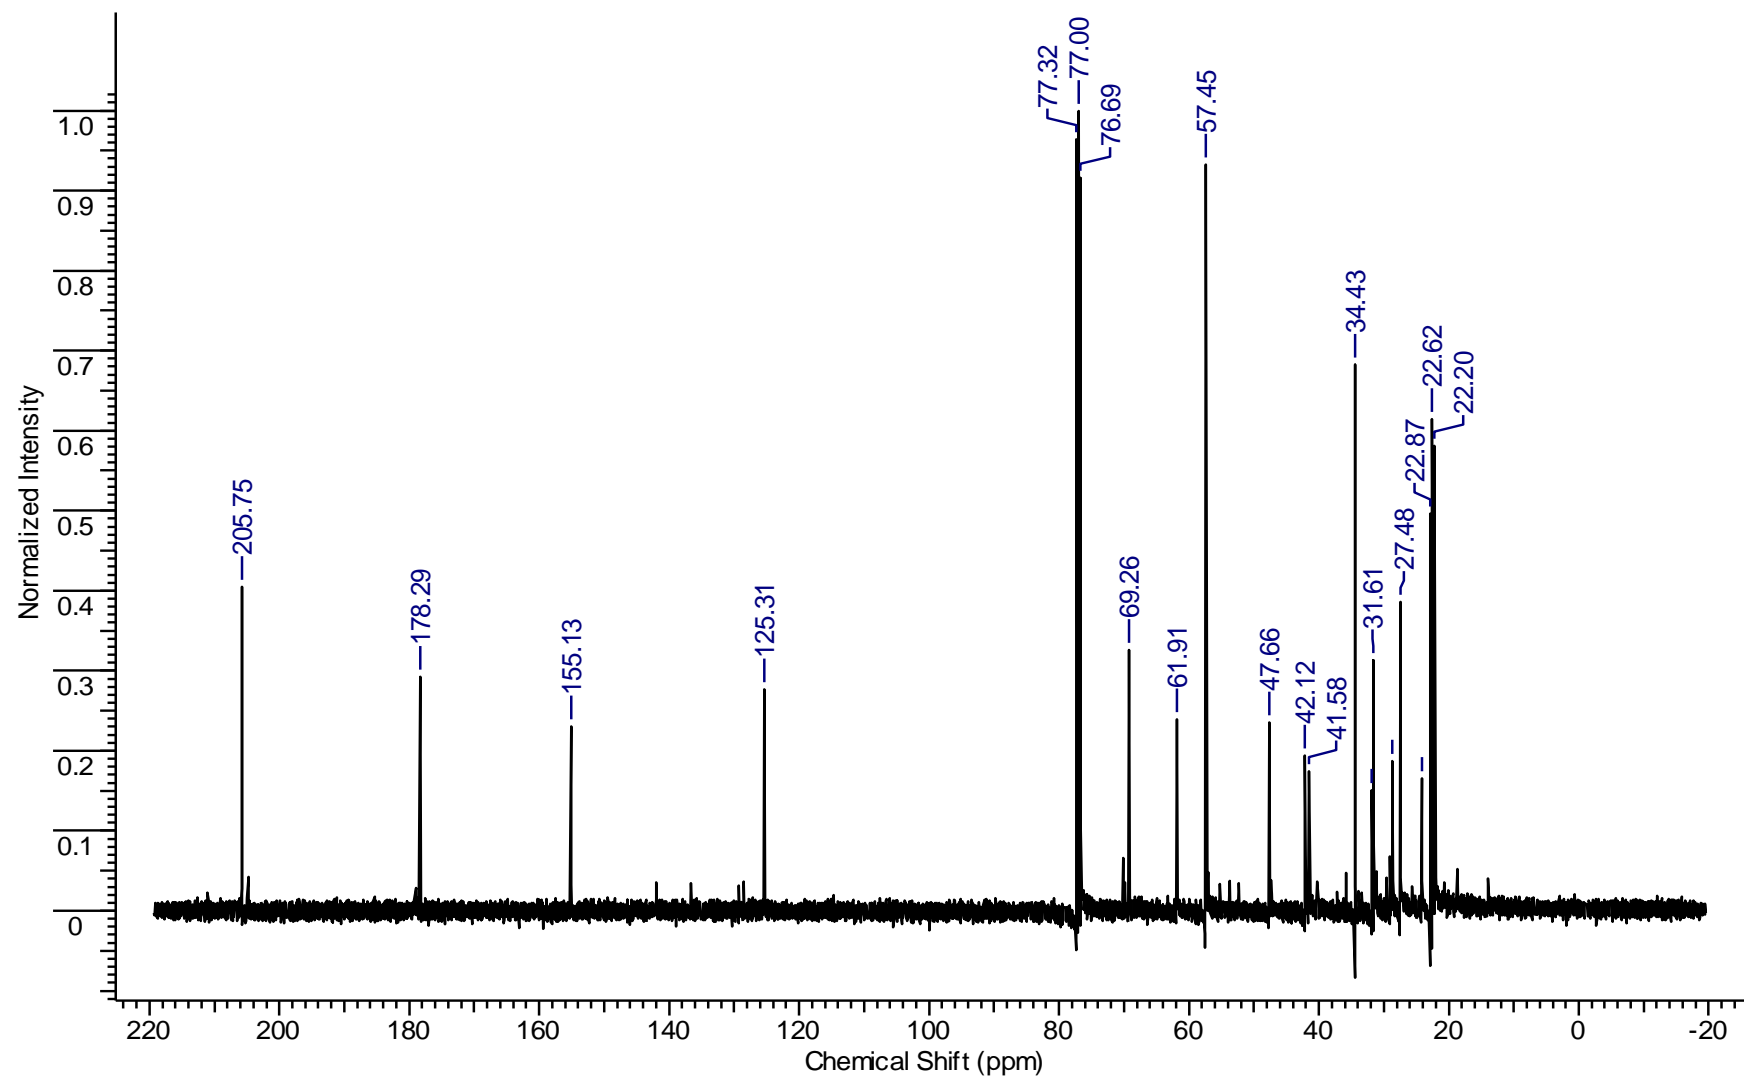

S4.  $^{13}\text{C}$  NMR spectrum of the compound **5** (100 MHz,  $\text{CDCl}_3$ )
